# Supplementary material for: A genetic program boosts mitochondrial function to power macrophage tissue invasion
Source: bioRxiv or medRxiv preprint supplement (doi:10.1101/2021.02.18.431643), 2021-02-18
Supplement: Supplementary file [file media-2.pdf]

**Table S1.** Fly lines utilized in this paper.

| Experimental models: Organisms/Strains                |                                                   |                           |                                                                                                 |
|-------------------------------------------------------|---------------------------------------------------|---------------------------|-------------------------------------------------------------------------------------------------|
| Designation                                           | Source of reference                               | Identifiers               | Additional information                                                                          |
| <i>srpHemo-Gal4</i>                                   | PMID: 15239955                                    | Brückner et al., 2004     | <i>D. melanogaster</i>                                                                          |
| <i>srpHemo-3xmCherry</i>                              | PMID: 29321168                                    | RRID:BDSC_78358 and 78359 | <i>D. melanogaster</i> (Gyoergy et al., 2018)                                                   |
| <i>srpHemo-H2A::3xmCherry</i>                         | PMID: 29321168                                    | RRID:BDSC_78360 and 78361 | <i>D. melanogaster</i> (Gyoergy et al., 2018)                                                   |
| <i>CG9005</i> <sup>BG02278</sup>                      | Bloomington <i>Drosophila</i> Stock Center (BDSC) | RRID:BDSC_12768           |                                                                                                 |
| <i>Df(2R)ED2222 (Df1)</i>                             | BDSC 8911                                         |                           |                                                                                                 |
| <i>Df(2R)BSC259 (Df2)</i>                             | BDSC 23159                                        |                           |                                                                                                 |
| <i>UAS-CG9005 RNAi 1</i>                              | VDRC                                              | VDRC: v106589             |                                                                                                 |
| <i>UAS-CG9005 RNAi 2</i>                              | VDRC                                              | VDRC: v36080              |                                                                                                 |
| <i>UAS-CG9005 RNAi 3</i>                              | BDSC                                              | BDSC: 33362               |                                                                                                 |
| <i>srpHemo-HA::CG9005 (srpHemo-HA::atossa)</i>        | this paper                                        |                           | CG9005 amplified from genome cloned into DSPL172 (PMID: 29321168)                               |
| <i>srpHemo-HA::atossa</i> <sup>nls1-</sup>            | this paper                                        |                           | CG9005 amplified from genome cloned into DSPL172                                                |
| <i>srpHemo-HA::atossa</i> <sup>DUF4210-</sup>         | this paper                                        |                           | CG9005 amplified from genome cloned into DSPL172                                                |
| <i>srpHemo-HA::atossa</i> <sup>ChrSeg-</sup>          | this paper                                        |                           | CG9005 amplified from genome cloned into DSPL172                                                |
| <i>srpHemo-HA::atossa</i> <sup>DUF4210-/ChrSeg-</sup> | this paper                                        |                           | CG9005 amplified from genome cloned into DSPL172                                                |
| <i>srpHemo-HA::atossa</i> <sup>TAD1-</sup>            | this paper                                        |                           | CG9005 amplified from genome cloned into DSPL172                                                |
| <i>srpHemo-HA::atossa</i> <sup>TAD2-</sup>            | this paper                                        |                           | CG9005 amplified from genome cloned into DSPL172 (PMID: 29321168)                               |
| <i>srpHemo-HA::atossa</i> <sup>TAD1-/TAD2-</sup>      | this paper                                        |                           | CG9005 amplified from genome cloned into DSPL172                                                |
| <i>srpHemo-FAM214A</i>                                | this paper                                        |                           | FAM214A amplified from dendritic cell cDNA library cloned into <i>srpHemo</i> plasmid (DSPL172) |
| <i>srpHemo-FAM214B</i>                                | this paper                                        |                           | FAM214B amplified from dendritic cell cDNA library                                              |

|                                                                                    |               |                              |                                                    |
|------------------------------------------------------------------------------------|---------------|------------------------------|----------------------------------------------------|
|                                                                                    |               |                              | cloned into<br><i>srpHemo</i> plasmid<br>(DSPL172) |
| <i>UAS-HA::EGFP</i>                                                                | this paper    |                              |                                                    |
| <i>UAS-CG9253 RNAi</i><br>( <i>porthos</i> )                                       | VDRC, RRID:   | VDRC: v36589                 |                                                    |
| <i>UAS-CG9331 RNAi 1</i><br>( <i>GRHPR</i> )                                       | (VDRC), RRID: | VDRC: v44653                 |                                                    |
| <i>UAS-CG9331 RNAi 2</i><br>( <i>GRHPR</i> )                                       | BDSC, RRID:   | BDSC: 64652                  |                                                    |
| <i>UAS-CG9331 RNAi 3</i><br>( <i>GRHPR</i> )                                       | (VDRC), RRID: | VDRC: v107680                |                                                    |
| <i>UAS-CG7144 RNAi 1</i><br>( <i>LKRSDH</i> )                                      | (VDRC), RRID: | VDRC: v51346                 |                                                    |
| <i>UAS-CG7144 RNAi 2</i><br>( <i>LKRSDH</i> )                                      | (VDRC), RRID: | VDRC: v109650                |                                                    |
| <i>UAS-CG2137 RNAi 1</i><br>( <i>Gpo2</i> )                                        | (VDRC), RRID: | VDRC: v1234                  |                                                    |
| <i>UAS-CG2137 RNAi 2</i><br>( <i>Gpo2</i> )                                        | BDSC, RRID:   | BDSC: 68145                  |                                                    |
| <i>UAS-CG11061 RNAi</i><br>( <i>GM130</i> )                                        | BDSC, RRID:   | BDSC: 64920                  |                                                    |
| <i>UAS-CG11061 RNAi</i><br>( <i>GM130</i> )                                        | (VDRC), RRID: | VDRC: v330284                |                                                    |
| <i>y[-] v[-];attP40-<br/>pVALIUM22-UAS-ATPsyn<br/>Subunit C (CG1746)<br/>E121Q</i> | (VDRC), RRID: | Thomas Hurd, et al.,<br>2016 |                                                    |
| <i>UAS-CG4769 RNAi 1 (Cyt-<br/>c1)</i>                                             | (VDRC), RRID: | VDRC: v109809                |                                                    |
| <i>UAS-CG4169 RNAi 2</i><br>( <i>UQCR-cp2</i> )                                    | (VDRC), RRID: | VDRC: v100818                |                                                    |
| <i>UAS-CG3731 RNAi 3</i><br>( <i>UQCR-cp1</i> )                                    | (VDRC), RRID: | VDRC: v101350                |                                                    |
| <i>UAS-CG3612 RNAi (ATP<br/>synthase F1F0)</i>                                     | (VDRC), RRID: | VDRC: v34664                 |                                                    |

**Table S2:** List of key resources used in this paper.

| <b>Antibodies</b>                                                                        |                                                 |                                      |                               |
|------------------------------------------------------------------------------------------|-------------------------------------------------|--------------------------------------|-------------------------------|
| <b>Designation</b>                                                                       | <b>Source of reference</b>                      | <b>Identifiers</b>                   | <b>Additional information</b> |
| Chicken polyclonal anti-GFP                                                              | Aves Labs                                       | Cat# GFP-1020,<br>RRID:AB_10000240   |                               |
| Rat monoclonal anti-HA                                                                   | Roche                                           | Roche Cat# 3F10,<br>RRID: AB_2314622 |                               |
| Mouse Lamin (lamin Dm0)                                                                  | <i>Drosophila</i> Studies Hybridoma Bank (DSHB) | Cat# ADL1010                         |                               |
| Mouse Fibrillarlin                                                                       | Rangan lab                                      | N/A                                  |                               |
| Mouse anti-Pyruvate Dehydrogenase E1-alpha subunit antibody (PDH E1 $\alpha$ ) [8D10E6 ] | Abcam                                           | Cat# ab110334,<br>RRID:AB_10866116   |                               |
| Rabbit antiphospho-Pyruvate Dehydrogenase E1-alpha subunit (PDH E1 $\alpha$ , S293)      | Abcam                                           | Cat# ab92696,<br>RRID:AB_10711672    |                               |
| Goat anti-Chicken IgY (H+L) Secondary Antibody, Alexa Fluor 488                          | Thermo Fisher Scientific                        | Cat# A-11039,<br>RRID: AB_2534096    |                               |
| Alexa Fluor 488 goat anti-rat                                                            | Thermo Fisher Scientific                        | Cat# A21212,<br>RRID: AB_11180047    |                               |
| Goat anti-Mouse IgG1 Secondary Antibody, Alexa Fluor 488 conjugate                       | Thermo Fisher Scientific                        | Cat# A-21121,<br>RRID: AB_2535764    |                               |
| Goat anti-Mouse IgG2b Secondary Antibody, Alexa Fluor 633 conjugate                      | Thermo Fisher Scientific                        | Cat# A-21146,<br>RRID:AB_2535782     |                               |
| Goat anti-Rabbit IgG (H+L) Secondary Antibody, Alexa Fluor 488 conjugate                 | Thermo Fisher Scientific                        | Cat# R37116,<br>RRID: AB_2556544     |                               |
| Phalloidin 488                                                                           | Thermo Fisher Scientific                        | Cat# A12379,<br>RRID:AB_2315147      |                               |

|                                       |                                         |                                     |  |
|---------------------------------------|-----------------------------------------|-------------------------------------|--|
| Phalloidin 633                        | Thermo Fisher Scientific                | Cat# 50-6559-05,<br>RRID:AB_2574272 |  |
| <b>Chemicals</b>                      |                                         |                                     |  |
| Vectashield mounting medium           | Vector Laboratories,<br>RRID:SCR_000821 | VectorLabs: H-1000                  |  |
| Vectashield Mounting medium with DAPI | Vector Laboratories,<br>RRID:SCR_000821 | VectorLabs: H-1200                  |  |
| Beckman Coulter 9/16x3.5 PA tubes     |                                         | Cat. #331372                        |  |

|                                               |                                                  |                 |  |
|-----------------------------------------------|--------------------------------------------------|-----------------|--|
| <b>Critical Commercial Assays</b>             |                                                  |                 |  |
| Infusion cloning kit                          | Clontech's European distributor                  | Cat# A14606     |  |
| MEGAscript_T7 Transcription Kit               | Thermo Fisher Scientific                         | Cat# AM1334     |  |
| MEGAscript_T3 Transcription Kit               | Thermo Fisher Scientific                         | Cat# AM1338     |  |
| Effectene Transfection Reagent kit            | Qiagen, Hilden, Germany                          |                 |  |
| DNeasy Blood & Tissue Kit                     | Qiagen, Hilden, Germany                          |                 |  |
| QIAGEN Rneasy Mini Kit                        | Qiagen, Hilden, Germany                          | Cat#74104       |  |
| Takyon™ No Rox SYBR MasterMix blue dTTP       | Eurogentec, Liege, Belgium                       |                 |  |
| TURBO DNA-free Kit                            | Life Technologies                                | Cat# AM1907     |  |
| Agilent Seahorse XF Cell Mito Stress Test kit | Agilent Technologies, Inc., Santa Clara, CA, USA | Cat# 103015-100 |  |
| Agilent 6000 Pico kit                         | Agilent Technologies, Waldbronn, Germany         | Cat# 5067-1513  |  |

**Table S3.** The DNA plasmid constructs utilized in gene construction.

| <b>Recombinant DNA</b>      |                                                  |                                        |                                                                           |
|-----------------------------|--------------------------------------------------|----------------------------------------|---------------------------------------------------------------------------|
| <b>Designation</b>          | <b>Source of reference</b>                       | <b>Identifiers</b>                     | <b>Additional information</b>                                             |
| <i>UAS-CG9005::FLAG::HA</i> | <i>Drosophila</i><br>Genomics<br>Resource Center | DGRC: UFO03339<br>Flybase: FBgn0033638 | <i>atossa</i>                                                             |
| <i>UAS-CG9253::FLAG::HA</i> | <i>Drosophila</i><br>Genomics<br>Resource Center | DGRC: UFO12394<br>Flybase: FBgn0032919 | <i>porthos</i>                                                            |
| <i>UAS-CG9331::FLAG::HA</i> | <i>Drosophila</i><br>Genomics<br>Resource Center | DGRC: UFO02643<br>Flybase: FBgn0032889 | Glyoxylate reductase (NADP(+))<br>Hydroxypyruvate reductase<br>(GR/HPR)   |
| <i>UAS-CG7144::FLAG::HA</i> | <i>Drosophila</i><br>Genomics<br>Resource Center | DGRC: UFO05689<br>Flybase: FBgn0286198 | Lysine ketoglutarate<br>reductase/saccharopine dehydrogenase<br>(LKRS DH) |
| <i>pAC-sgRNA-Cas9</i>       | Addgene                                          | Addgene: 49330                         | 49330 (DSPL 232)                                                          |

**Table S4.** Oligonucleotides utilized in gene construction.

| No. | Name                            | Sequence                                                                        |
|-----|---------------------------------|---------------------------------------------------------------------------------|
| 1   | FP-CG9005                       | TAGAAGCTTCTGCAAATGATACCGACAAGCGTCACC                                            |
| 2   | RP-CG9005                       | GTGCCTAGGCGCGCCCTAAATCCTGCCGGCGCT                                               |
| 3   | FP-HACG9005                     | TAGAAGCTTCTGCAAATGTACCCATACGATGTTCCAGATTAC<br>GCTGCCGCCGCCATGATACCGACAAGCGTCACC |
| 4   | RP-HACG9005                     | GTGCCTAGGCGCGCCAGCGTAATCTGGAACATCGTATGGGT<br>AGGCGGGCGCAATCCTGCCGGCGCTCTC       |
| 5   | infFPCG9005_NotIBluS            | ACGCGGTGGCGGCCATGTACCCATACGATGTTCCAG                                            |
| 6   | infRPCG9005_NotIBluS            | CGAAGTTATGCGGCCCTAAATCCTGCCGGCGCTC                                              |
| 7   | FP-DUF4210 <sup>*</sup> CG9005  | TTGTGCGAGATTCGTTTGCCG                                                           |
| 8   | RP-DUF4210 <sup>*</sup> CG9005  | AACGGACGTCCTCAAATTGAG                                                           |
| 9   | FP-ChrSeg <sup>*</sup> CG9005   | AGTGC GCGACAGGAGAGC                                                             |
| 10  | RP- ChrSeg <sup>*</sup> -CG9005 | AGTCGCTTCATCTGCTCGG                                                             |
| 13  | FP-FAM214A-V13                  | ATGAAGCCAGACCGAGATGC                                                            |
| 14  | RP-FAM214A                      | TCAACATCTTGGTGAAAAGTGA                                                          |
| 15  | infFP-FAM214A-V13               | TAGAAGCTTCTGCAAATGAAGCCAGACCGAGATGC                                             |
| 16  | infRP-FAM214A                   | GTGCCTAGGCGCGCCTCAACATCTTGGTGAAAAGTGA                                           |
| 17  | PF-FAM214B                      | GGCTTCATGCGCCACGTG                                                              |
| 18  | RP-FAM214B                      | CGATCAGGGCAAAGGTGAATAACG                                                        |
| 19  | infFP-FAM214B                   | TAGAAGCTTCTGCAAGGCTTCATGCGCCACGTG                                               |
| 20  | infRP-FAM214B                   | GTGCCTAGGCGCGCCCGATCAGGGCAAAGGTGA                                               |
| 21  | Insitu-CG9005 FP1               | CCTCCTGGGCTCGGCTACTGC                                                           |
| 22  | Insitu-CG9005 RP1               | GATAATACGACTCACTATAGGGTTGACGTTGGGAAAATT                                         |
| 23  | Insitu-CG9005 RP2               | GATAATACGACTCACTATAGGGTTGCAAAGTTGTGCT                                           |
| 24  | Insitu-CG9253 FP1               | GGAAAGATCTCGGTCTCAATGAG                                                         |
| 25  | Insitu-CG9253 RP1               | GATAATACGACTCACTATAGGGCCATCACCTCATCTCC                                          |
| 26  | sgRNA-F1-CG9005                 | TTCG GCAGTCGGATGTCCGTATGCAGG                                                    |
| 27  | sgRNA-R1-CG9005                 | AACGCATACGGACATCCGACTGC C                                                       |
| 28  | sgRNA-F2-CG9005                 | TTCGCAGTTCGTAGAAGTAAGAGACGG                                                     |

|    |                        |                                        |
|----|------------------------|----------------------------------------|
| 29 | sgRNA-R2-CG9005        | AACTCTTCTACTTCTACGAACTG C              |
| 30 | sgRNA-F3-CG9005        | TTCGCGGCGGATTCTGTCCCACCCAGG            |
| 31 | sgRNA-R3-CG9005        | AACGGGTGGGACAGAATCCGCCG C              |
| 32 | sgRNA-F1-CG9253        | TTCGGATCCAACGTGAGGCCATTCCGG            |
| 33 | sgRNA-R1-CG9253        | AACGAATGGCCTCACGTTGGATC C              |
| 34 | sgRNA-F2-CG9253        | TTCGGGCCATTCCGGTCGCCTTACAGG            |
| 35 | sgRNA-R2-CG9253        | AACGTAAGGCGACCGGAATGGCC C              |
| 36 | sgRNA-F3-CG9253        | TTCGCCCTCGTGGGGGTTAGCACGAGG            |
| 37 | sgRNA-R3-CG9253        | AACCGTGCTAACCCCCACGAGGG C              |
| 38 | infNotI-TCHA-EGFPHA-FP | AACAGATCTGCGGCCGCATGTGTTGCCCGGGCTGCTGT |
| 39 | infNotI-TCHA-EGFP-RP   | CCTCGAGCCGCGGCCGCTTAAGCGTAATCTGGCACATC |
| 40 | CG9005qPCR-FP1         | TG TTCAGATTCTCGCCACCA                  |
| 41 | CG9005qPCR-RP1         | TGAGGATTTGCCCAGCTGTT                   |
| 42 | CG9005qPCR-FP2         | GCACGCCTTATTTGTGCGAG                   |
| 43 | CG9005qPCR-RP2         | CCCGCATGTTCGTAGGGTATC                  |
| 44 | CG9005qPCR-FP3         | TATGCGGCAGGGAGAAAGTT                   |
| 45 | CG9005qPCR-RP3         | GTGGTCTCTTCTGTCCACCG                   |
| 46 | CG9253qPCR-FP1         | GCCTTACAGGGCAAGGATGT                   |
| 47 | CG9253qPCR-RP1         | ATGCCAATCCCGCTACCAAG                   |
| 48 | CG9253qPCR-FP2         | TCTAGGTAGCGAGGAGGAGC                   |
| 49 | CG9253qPCR-RP2         | TGGCCTCACGTTGGATCTTC                   |
| 50 | CG9253qPCR-FP3         | TTCGACCACGTGCTGCTATT                   |
| 51 | CG9253qPCR-RP3         | TTGTAGCTGCGTCTGTTCGT                   |
| 52 | RpL32 qPCR-FP          | AGCATAACAGGCCCAAGATCG                  |
| 53 | RpL32 qPCR-RP          | TGTTGTCGATACCCTTGGGC                   |
| 54 | RpS20 qPCR-FP          | ACGGTGCAAAGAACCAGAACT                  |
| 55 | RpS20 qPCR-RP          | GGAGTCTTACGGGTGGTGATG                  |
| 56 | pAC-sgRNA-Cas9-U6F     | TTTGATTCTAAAGGAAATTTGAAAA              |

**Table S5.** List of software tools, analytical packages, and laboratory devices utilized in this paper.

| Software and Algorithms                                      |                     |                                                                                                                                                                                                          |
|--------------------------------------------------------------|---------------------|----------------------------------------------------------------------------------------------------------------------------------------------------------------------------------------------------------|
| Designation                                                  | Source of reference | Identifiers                                                                                                                                                                                              |
| ImageJ/FIJI                                                  |                     | <a href="http://fiji.sc/">http://fiji.sc/</a><br>RRID:SCR_002285)                                                                                                                                        |
| Imaris                                                       | Bitplane            | <a href="http://www.bitplane.com/imaris/imaris">http://www.bitplane.com/imaris/imaris</a> ,<br>RRID:SCR_007370                                                                                           |
| Matlab                                                       | Mathworks           | <a href="https://www.mathworks.com/products/matlab.html">https://www.mathworks.com/products/matlab.html</a> ,<br>RRID:SCR_001622                                                                         |
| FlowJo                                                       |                     | <a href="https://www.flowjo.com/">https://www.flowjo.com/</a> RRID:SCR_008520                                                                                                                            |
| LaVision ImSpector                                           | LaVision BioTec     | <a href="http://www.lavisionbiotec.com/">http://www.lavisionbiotec.com/</a> ,<br>RRID:SCR_015249                                                                                                         |
| Proteome Discoverer 1.4                                      |                     | <a href="https://www.thermofisher.com/order/catalog/product/OPTON-30795">https://www.thermofisher.com/order/catalog/product/OPTON-30795</a> ,<br>RRID:SCR_014477                                         |
| LightCycler 480 software (v. 1.5)                            | Roche Diagnostics   | <a href="https://lifescience.roche.com/en_at/products/lightcycler14301-480-software-version-15.html">https://lifescience.roche.com/en_at/products/lightcycler14301-480-software-version-15.html</a>      |
| 9 aaTAD Prediction Tool                                      |                     | <a href="https://www.med.muni.cz/9aaTAD/analysis.php#matches">https://www.med.muni.cz/9aaTAD/analysis.php#matches</a>                                                                                    |
| Conserved Domain Architecture Retrieval Tool (CDART) program |                     | <a href="https://www.ncbi.nlm.nih.gov/Structure/8exington/8exington.cgi">https://www.ncbi.nlm.nih.gov/Structure/8exington/8exington.cgi</a>                                                              |
| Conserved Domain Database (CDD)                              |                     | <a href="https://www.ncbi.nlm.nih.gov/Structure/cdd/wrpsb.cgi">https://www.ncbi.nlm.nih.gov/Structure/cdd/wrpsb.cgi</a>                                                                                  |
| Prism                                                        | GraphPad            | <a href="https://www.graphpad.com/scientific-software/prism/">https://www.graphpad.com/scientific-software/prism/</a><br>RRID:SCR_002798                                                                 |
| Flyrnai                                                      | sgRNA design        | <a href="https://www.flyrnai.org/crispr/">https://www.flyrnai.org/crispr/</a><br><a href="http://tools.flycrispr.molbio.wisc.edu/targetFinder/">http://tools.flycrispr.molbio.wisc.edu/targetFinder/</a> |
| NCBI primer design tool                                      | Primer design       | <a href="https://www.ncbi.nlm.nih.gov/tools/primer-blast/">https://www.ncbi.nlm.nih.gov/tools/primer-blast/</a>                                                                                          |
| Infusion primer tool                                         | Clontech website    | <a href="http://bioinfo.clontech.com/infusion/convertPcrPrimersInit.do">http://bioinfo.clontech.com/infusion/convertPcrPrimersInit.do</a>                                                                |
| HISAT2                                                       |                     | <a href="https://ccb.jhu.edu/software/hisat2/index.shtml">https://ccb.jhu.edu/software/hisat2/index.shtml</a><br>Kim et al., 2015                                                                        |
| MEME Suite                                                   |                     | <a href="http://meme-suite.org/doc/overview.html">http://meme-suite.org/doc/overview.html</a><br>Bailey et al., 2009                                                                                     |
| Homer (v4.10.4)                                              |                     | <a href="http://homer.ucsd.edu/homer/">http://homer.ucsd.edu/homer/</a>                                                                                                                                  |



| <b>Others</b>                                  |                                   |                                                                                                                                                                                   |
|------------------------------------------------|-----------------------------------|-----------------------------------------------------------------------------------------------------------------------------------------------------------------------------------|
| <b>Designation</b>                             | <b>Source of reference</b>        | <b>Identifiers</b>                                                                                                                                                                |
| Nikon Eclipse Ti Inverted widefield Microscope | Nikon                             | <a href="https://www.nikoninstruments.com/en_EU/Products/Inverted-Microscopes/Eclipse-Ti-E">https://www.nikoninstruments.com/en_EU/Products/Inverted-Microscopes/Eclipse-Ti-E</a> |
| Zeiss LSM 800 Confocal Microscope              | Zeiss                             | <a href="https://www.zeiss.com/microscopy/us/products/confocal-microscopes.html">https://www.zeiss.com/microscopy/us/products/confocal-microscopes.html</a>                       |
| LaVision 2-Photon Inverted Microscope          | LaVision BioTec                   | <a href="http://www.lavisionbiotec.com/products/trim-scope-ii-1.html">http://www.lavisionbiotec.com/products/trim-scope-ii-1.html</a>                                             |
| YSI Stretch membranes                          | YSI                               | <a href="https://www.ysi.com/Accessory/id-066155/Membranes-10-Pack-Standard">https://www.ysi.com/Accessory/id-066155/Membranes-10-Pack-Standard</a>                               |
| LightCycler 480                                | Roche Diagnostics                 | Idaho Technology Inc., Salt Lake City, UT, USA.                                                                                                                                   |
| FACS Aria III (BD) flow cytometer              |                                   |                                                                                                                                                                                   |
| Leica SP8 FALCON inverted confocal             | WLL, FALCON, Leica                | <a href="https://www.leica-microsystems.com/products/confocal-microscopes/p/dive/">https://www.leica-microsystems.com/products/confocal-microscopes/p/dive/</a>                   |
| Beckman L7 ultracentrifuge                     | Beckman Coulter, Krefeld, Germany |                                                                                                                                                                                   |
