# Supplementary material for: A genetic program boosts mitochondrial function to power macrophage tissue invasion
Source: bioRxiv or medRxiv preprint supplement (doi:10.1101/2021.02.18.431643), 2021-02-18
Supplement: Supplementary file [file media-3.pdf]

**Table 1.** Expression of FAM214A and FAM214B genes, the vertebrate orthologs of *Drosophila Atossa*, in vertebrate human immune cells.

| Gene           | Immune Cells w/highest level                                 | Description                                 | Expression data    | Source                                                                                                                                                                                                                                                                                              |
|----------------|--------------------------------------------------------------|---------------------------------------------|--------------------|-----------------------------------------------------------------------------------------------------------------------------------------------------------------------------------------------------------------------------------------------------------------------------------------------------|
| <b>FAM214A</b> | Plasmacytoid dendritic cells (DCs)                           | Human                                       | RNA Seq            | <b>The Human Protein Atlas</b><br><a href="https://www.proteinatlas.org/ENSG00000047346-FAM214A/blood">https://www.proteinatlas.org/ENSG00000047346-FAM214A/blood</a>                                                                                                                               |
|                | Dendritic cells (DC.DC6.123+.Bl)                             | Human population<br>Medium level expression | Population RNA Seq | <b>Immune Cell Atlas</b><br><a href="http://immunecellatlas.net/ICA_Skyline.php?gene=FAM214A&amp;celltype=all&amp;organ=Blood&amp;datatype=rnaseq&amp;scale=Local">http://immunecellatlas.net/ICA_Skyline.php?gene=FAM214A&amp;celltype=all&amp;organ=Blood&amp;datatype=rnaseq&amp;scale=Local</a> |
|                | Plasma B cells (B.PC)                                        | High expression                             | RNA Seq            | <b>Immgen</b><br><a href="http://rstats.immgen.org/Skyline/skyline.html">http://rstats.immgen.org/Skyline/skyline.html</a>                                                                                                                                                                          |
|                | Regulatory T cells (Cd4+, Cd25+)                             | Human                                       | Microarray         | <b>BioGPS</b><br><a href="http://biogps.org/#goto=genereport&amp;id=56204">http://biogps.org/#goto=genereport&amp;id=56204</a>                                                                                                                                                                      |
| <b>FAM214B</b> | Neutrophils                                                  | Human                                       | RNA Seq            | <b>The Human Protein Atlas</b><br><a href="https://www.proteinatlas.org/ENSG00000005238-FAM214B/blood">https://www.proteinatlas.org/ENSG00000005238-FAM214B/blood</a>                                                                                                                               |
|                | Blood monocytes (Mo.16+.Bl, CD16+)                           | Human population<br>Medium level expression | Population RNA Seq | <a href="http://immunecellatlas.net/ICA_Skyline.php?gene=FAM214B&amp;celltype=all&amp;organ=Blood&amp;datatype=rnaseq&amp;scale=Local">http://immunecellatlas.net/ICA_Skyline.php?gene=FAM214B&amp;celltype=all&amp;organ=Blood&amp;datatype=rnaseq&amp;scale=Local</a>                             |
|                | Neutrophils Thio-induced peritoneal neutrophils (GN.Thio.PC) | High expression                             | RNA Seq            | <b>Immgen</b><br><a href="http://rstats.immgen.org/Skyline/skyline.html">http://rstats.immgen.org/Skyline/skyline.html</a>                                                                                                                                                                          |
|                | Neutrophils                                                  | Human                                       | Microarray         | <b>BioGPS</b><br><a href="http://biogps.org/#goto=genereport&amp;id=80256">http://biogps.org/#goto=genereport&amp;id=80256</a>                                                                                                                                                                      |
